# Supplementary material for: Construction and Analysis of an Integrated Regulatory Network Derived from High-Throughput Sequencing Data
Source: PubMed Central journal article supplement (PMC3219617; doi:10.1371/journal.pcbi.1002190), 2011-11-17

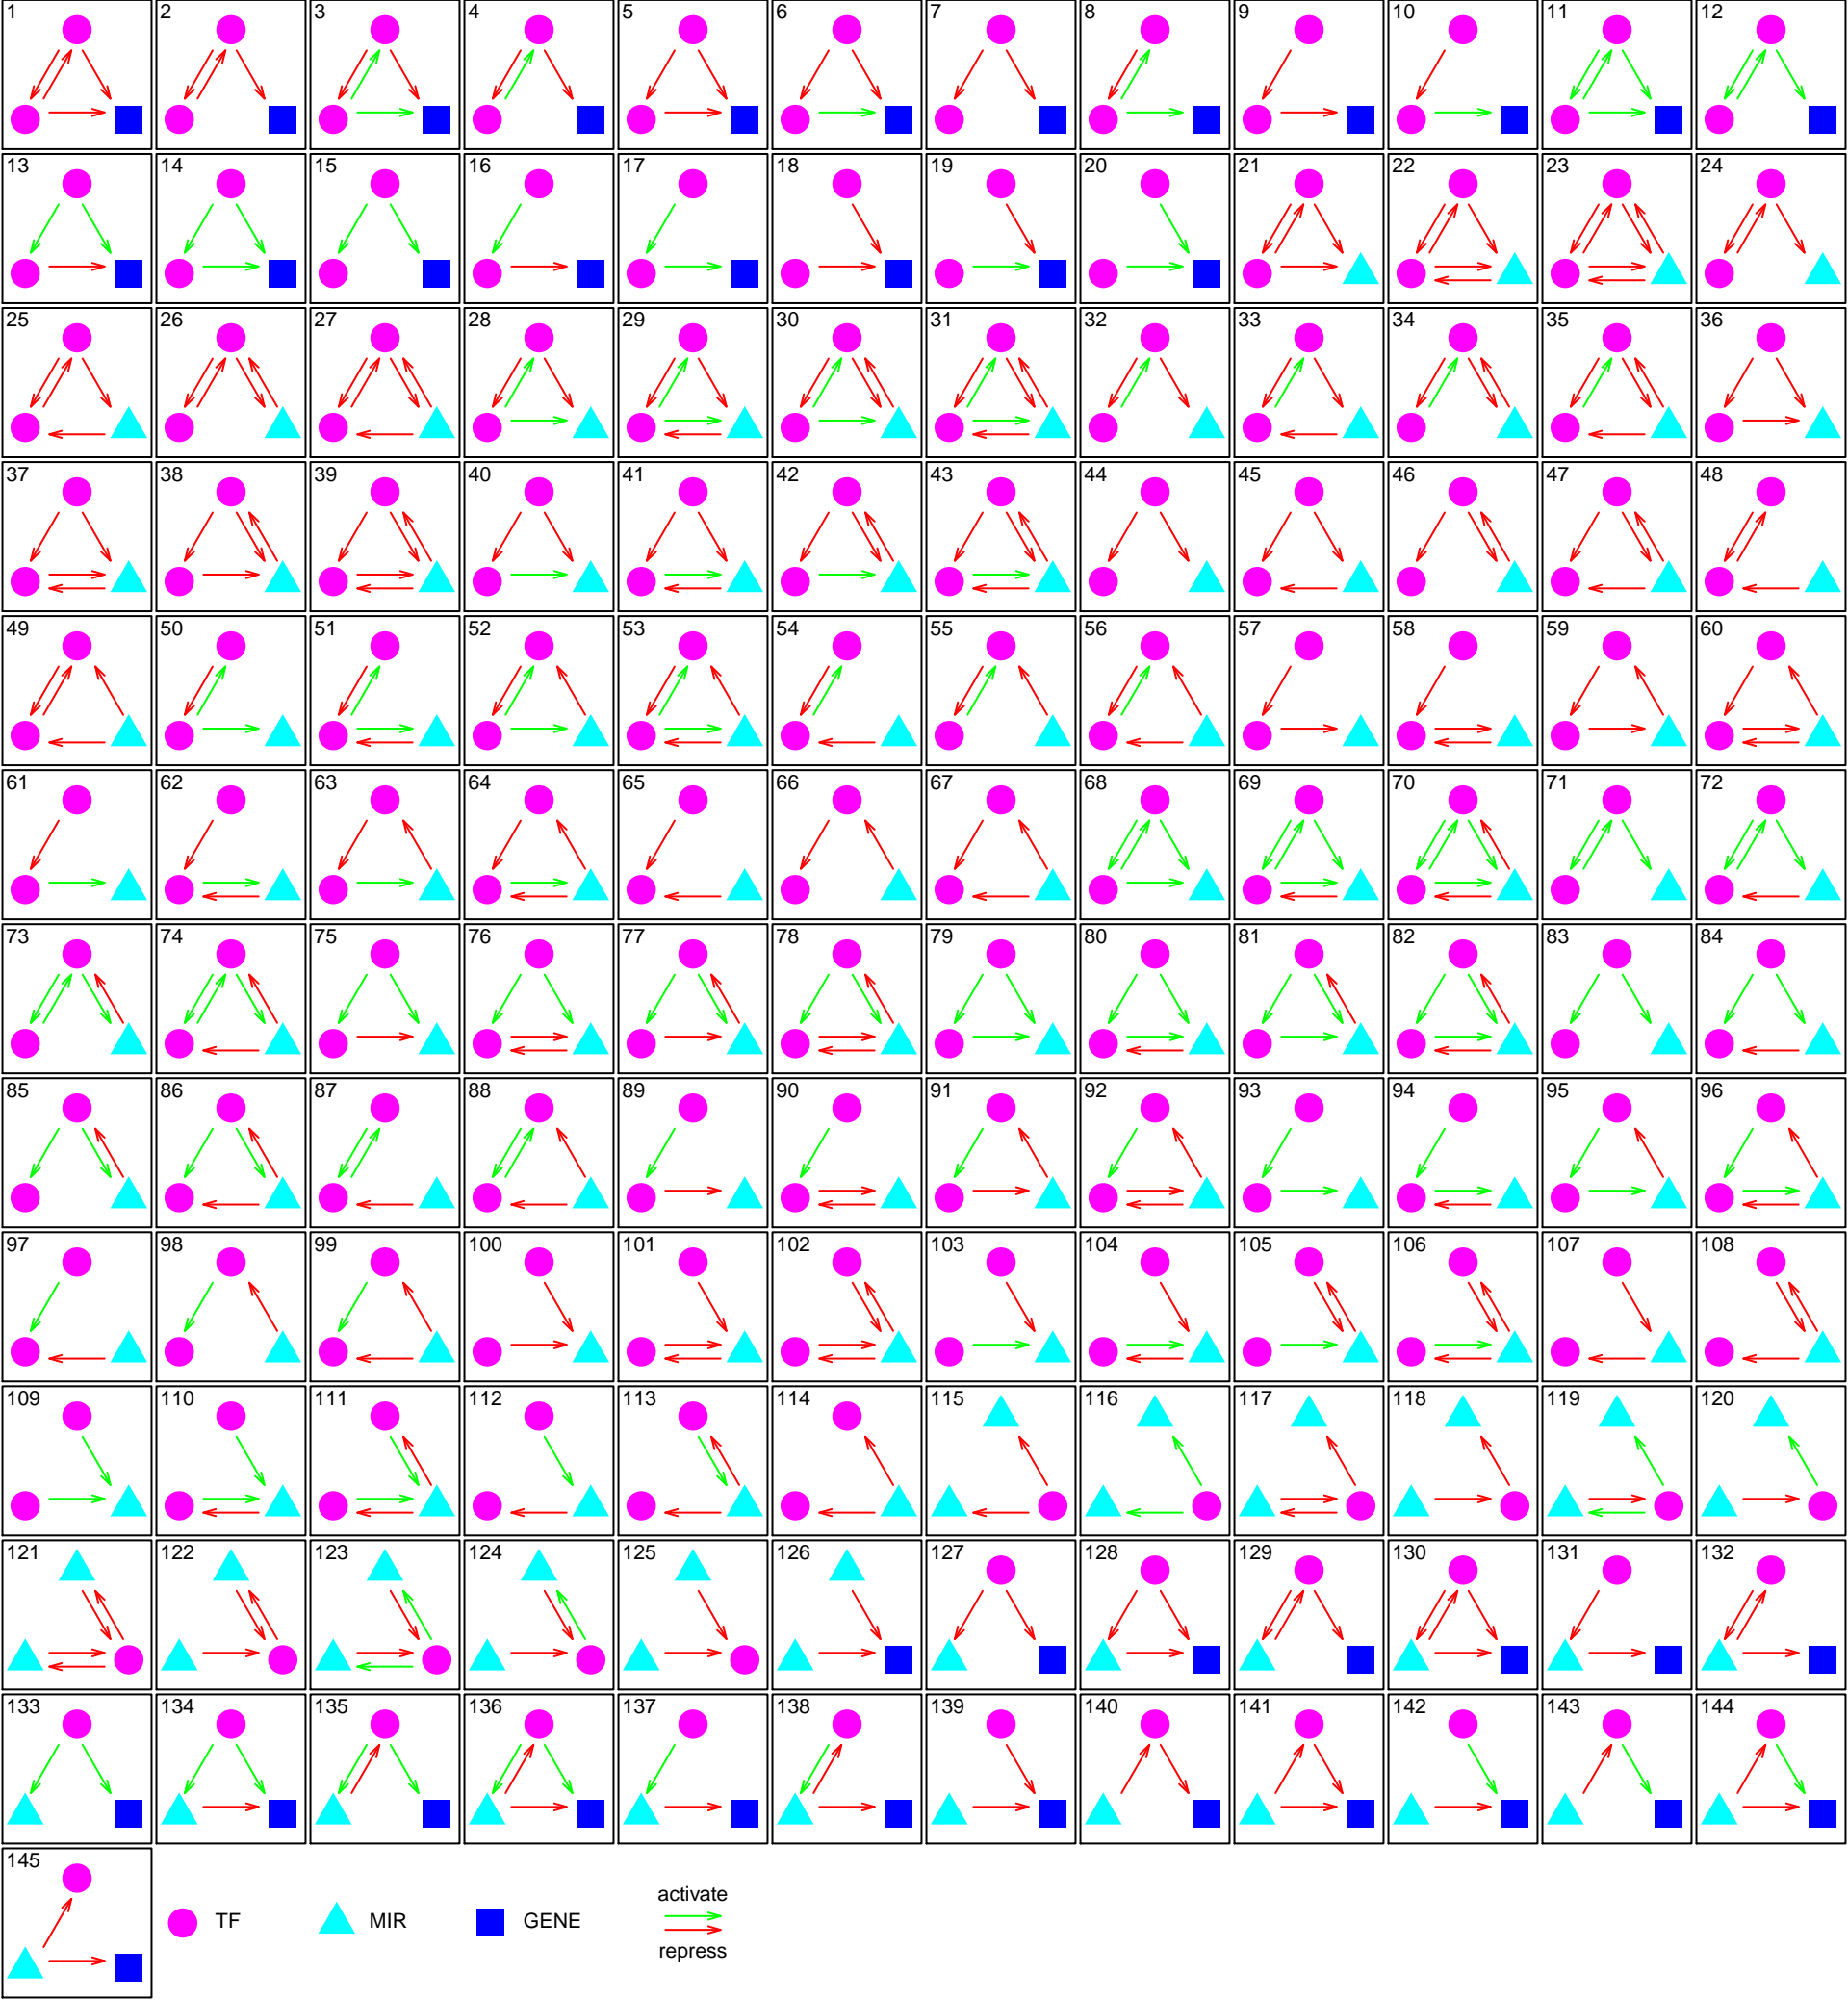

Supplement: pcbi.1002190.s006.pdf [file pcbi.1002190.s006.pdf]
