# Supplementary material for: Construction and Analysis of an Integrated Regulatory Network Derived from High-Throughput Sequencing Data
Source: PubMed Central journal article supplement (PMC3219617; doi:10.1371/journal.pcbi.1002190), 2011-11-17
Supplement: pcbi.1002190.s010.pdf [file pcbi.1002190.s010.pdf]

Note: case 7 is the one shown in the paper.

|           |                       | case1      | case2      | case3       | case4       | case5      | case6      | case7       | case8       |
|-----------|-----------------------|------------|------------|-------------|-------------|------------|------------|-------------|-------------|
| Parameter | Promoter              | [-500,300] | [-500,300] | [-1000,500] | [-1000,500] | [-500,300] | [-500,300] | [-1000,500] | [-1000,500] |
|           | HOT excluded          | No         | No         | No          | No          | Yes        | Yes        | Yes         | Yes         |
|           | miR target prediction | 3-way      | 5-way      | 3-way       | 5-way       | 3-way      | 5-way      | 3-way       | 5-way       |
| Topology  | #TF                   | 376        | 342        | 413         | 384         | 360        | 320        | 393         | 357         |
|           | #miR                  | 160        | 157        | 160         | 157         | 160        | 157        | 160         | 158         |
|           | #Gene                 | 5295       | 4857       | 6059        | 5720        | 4874       | 4366       | 5574        | 5158        |
|           | TF->TF                | 1513       | 1513       | 1969        | 1969        | 1225       | 1225       | 1498        | 1498        |
|           | TF->Gene              | 21119      | 21119      | 27254       | 27254       | 16990      | 16990      | 20592       | 20592       |
|           | TF->miR               | 369        | 369        | 373         | 373         | 282        | 282        | 452         | 452         |
|           | miR->Gene             | 9011       | 2853       | 9011        | 2853        | 9011       | 2853       | 9011        | 2853        |

|                                                                                     | P-value | case1 | case2 | case3  | case4  | case5  | case6  | case7  | case8  |
|-------------------------------------------------------------------------------------|---------|-------|-------|--------|--------|--------|--------|--------|--------|
| 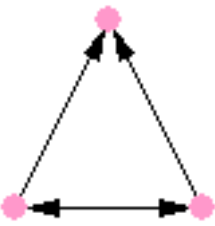  |         | 0.017 | 0.008 | <0.001 | <0.001 | <0.001 | <0.001 | <0.001 | <0.001 |
|  |         | 0.754 | 0.841 | 0.971  | 0.964  | 0.799  | 0.9    | 0.332  | 0.888  |
|  |         | 0.054 | 0.065 | 0.042  | 0.049  | 0.001  | 0.002  | 0.015  | 0.02   |
|  |         | 0.047 | 0.091 | 0.026  | 0.081  | 0.097  | 0.081  | 0.035  | 0.029  |

|                                                                                     |       |       |        |        |        |        |        |        |
|-------------------------------------------------------------------------------------|-------|-------|--------|--------|--------|--------|--------|--------|
| 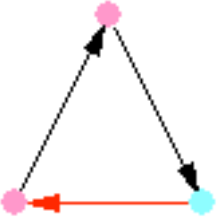   | 0.772 | 0.648 | 0.582  | 0.624  | 0.922  | 0.622  | 0.556  | 0.278  |
|    | 0.119 | 0.141 | 0.054  | 0.045  | 0.219  | 0.37   | 0.04   | 0.037  |
|    | 0.584 | 0.578 | 0.284  | 0.259  | <0.001 | <0.001 | <0.001 | <0.001 |
|  | 0.256 | 0.717 | 0.075  | 0.282  | 0.169  | 0.288  | 0.034  | 0.039  |
|  | 0.148 | 0.01  | 0.997  | 0.997  | 0.201  | 0.072  | 0.39   | 0.637  |
|  | 0.027 | 0.034 | <0.001 | <0.001 | 0.054  | 0.077  | 0.005  | 0.004  |
