# Supplementary material for: Construction and Analysis of an Integrated Regulatory Network Derived from High-Throughput Sequencing Data
Source: PLoS Comput Biol. 2011 Nov 17;7(11):e1002190. doi: 10.1371/journal.pcbi.1002190 (PMC3219617; doi:10.1371/journal.pcbi.1002190)
Supplement: Table S1 — Properties of C. elegans transcription factors. Essentiality of transcription factors was determined by RNAi experiments. Tissue specificity and stage specificity were calculated based on the expression profiles of genes in 8 tissues at L2 stage and the developmental stage time course, respectively. (XLS) [file pcbi.1002190.s007.xls]

## Sheet: Final_info_22_TFs.xls
TF	Stage	Level	Essentiality	#Regulatory miRNAs	#Target miRNAs	#Target genes	Degree in PPI	Hox	Stage Specificity Score	Tissue Specificity Score
ALR-1	L2	Top	N	0	12	640	0	Y	0.340381	0.423281
CEH-14	L2	Top	N	0	13	567	6	Y	0.0711701	0.637065
CEH-30	LEMB	Top	N	7	24	637	0	Y	0.920798	0.90022
HLH-1	EMB	Top	Y	0	13	321	13	N	0.452203	0.327691
LIN-11	L2	Top	N	3	6	203	2	Y	0.195624	1.07572
LIN-13	EMB	Top	N	0	24	764	32	N	0.348241	0.106385
MDL-1	L1	Top	N	7	30	1995	5	N	0.123983	0.152912
PES-1	L4	Top	N	0	29	1441	0	N	1.83921	1.82718
PQM-1	L3	Top	N	0	28	1016	0	N	0.21378	0.148356
BLMP-1	L2	Middle	N	7	33	2028	66	N	0.447805	0.412501
EGL-5	L3	Middle	N	6	14	465	9	Y	0.54553	0.112439
ELT-3	L1	Middle	N	9	10	965	0	N	0.183195	-0.0278141
EOR-1	L3	Middle	N	0	29	1647	23	N	0.253926	0.385378
LIN-15B	L3	Middle	N	0	26	1580	4	N	NA	NA
LIN-39	L3	Middle	N	4	16	937	46	Y	0.19363	0.174179
MAB-5	L3	Middle	N	10	5	487	16	Y	0.175354	0.0425913
MEP-1	EMB	Middle	Y	0	18	1392	39	N	0.254272	0.0928653
PHA-4	LEMB,L1,L2,YA	Middle	Y	0	73	3111	29	N	0.750853	0.0720469
SKN-1	L1	Middle	Y	13	29	1420	12	N	0.0767956	0.0317295
UNC-130	L1	Middle	N	11	6	163	45	N	0.6138	0.279805
EGL-27	L1	Bottom	N	4	12	226	104	N	0.231275	0.0214113
GEI-11	L4	Bottom	Y	0	2	91	85	N	0.103844	0.105388
